# Supplementary material for: Fracture-controlled fluid transport supports microbial methane-oxidizing communities at Vestnesa Ridge
Source: Copernicus journal article supplement (doi:10.5194/bg-16-2221-2019), 2019-05-29
Supplement: Supplementary file 1 [file bg-16-2221-2019-supplement.zip]

Archive with 3 entries (3 files):
- 893MC X-ray.mp4
- Supplement .xlsx
- bg-16-2221-2019-supplement-title-page.pdf
