# Supplementary material for: Fracture-controlled fluid transport supports microbial methane-oxidizing communities at Vestnesa Ridge
Source: Copernicus journal article supplement (doi:10.5194/bg-16-2221-2019), 2019-05-29
Supplement: Supplementary file 1 [file bg-16-2221-2019-supplement.zip › bg-16-2221-2019-supplement-title-page.pdf]

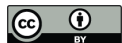

## *Supplement of*

# **Fracture-controlled fluid transport supports microbial methane-oxidizing communities at Vestnesa Ridge**

**Haoyi Yao et al.**

*Correspondence to:* Haoyi Yao ([haoyi.yao@uit.no](mailto:haoyi.yao@uit.no))

- [bg-16-2221-2019-supplement-title-page.pdf](#)
- [893MC X-ray.mp4](#)
- [Supplement.xlsx](#)

The copyright of individual parts of the supplement might differ from the CC BY 4.0 License.
