# Supplementary material for: Fracture-controlled fluid transport supports microbial methane-oxidizing communities at Vestnesa Ridge
Source: Copernicus journal article supplement (doi:10.5194/bg-16-2221-2019), 2019-05-29
Supplement: Supplementary file 1 [file bg-16-2221-2019-supplement.zip › Supplement .xlsx]

## Sheet: Porewater
893MC	Depth(cm)	methane(mM)		Depth(cm)	alk	d13C-DIC	DIC(mM)	HS (mM)	SO4 (mM)
	4	7.4249		0
	6	13.8676		1	2.7537	-3.3629	2.5641	0.0096168	26.7347
	8	12.1267		3				0.019	26.7347
	10	9.1959		5				0.0722	26.3265
	12	8.3098		7				0.0973	26.0204
	14	11.9251		9	4.5174	-8.5441	3.9741	0
	16	11.4713		11				0.2444	25.9184
	18	4.0867		13				0.3694	25.7143
	20	7.2192		15	6.5133		4.3816	0.8268
	22	6.1278		17				1.1659	24.1837
	24	4.83		19				1.3719	23.7755
	26	3.9358		21	8.623	-13.0674	5.3136	1.5983	23.2653
	30	4.4313		23				1.8665	22.551
	32	6.3		25	9.7182	-15.7119	6.0929	2.1168	22.3469
	34	4.4653		27				2.3033	22.1429
	36	4.5456		29	11.1353	-18.1613	6.9472	2.4935	21.5306
	38	4.4567		31				2.7302	21.3265
				33	11.3834	-17.7324	6.3681	2.7405	21.5306
				35				2.3803	21.9388
				37	11.1487	-16.4508	5.9092	2.5786	22.2449
886MC	Depth(cm)	methane(mM)		Depth(cm)	alk	d13C-DIC	DIC	HS (mM)	SO4 (mM)
	3	0.1304		0				0	26.7347
	8	0.3782		2	2.5125	-0.5409	2.6453	0
	12	0.8145		4	2.7018			0
	16	0.6319		6	2.7113			0
	20	1.1797		8				0
	22	2.3514		10				0
	26	4.5401		12	2.8947	-6.1219	3.0062	0	26.7347
	30	8.2676		14				0
	34	6.7246		16	2.8613			0
	38	4.7607		18				0
				20	3.2675	-8.1238	3.3896	0	26.5306
				22				0.0126
				24	3.605	-10.6734	3.5498	0.0864
				26	3.7966			0.1603	26.5306
				28	4.3831	-12.5624	3.8555	0.5351	26.3265
				30
				32	9.7389	-19.0837	4.4502	1.7234	24.1837
				34			4.9556	2.4319	23.7755
				37	11.1487	-16.4508	5.9092	2.5786	22.2449
008PC				Depth(cm)	alk	d13C-DIC		HS (mM)	SO4 (mM)
				0	2.33			0.0283	27.7948
				3	34.58	-37.7204		5.8247	13.8454
				5	42.24	-38.0804		5.7706	1.1243
				7	36.14	-37.2653		6.0008	1.1243
				9		-38.6315		5.8442	0.7037
				11	41.57	-38.4711		5.9202	2.9044
				13	45.92			5.9403	0.3019
				15	48.81	-39.8622		5.9806	0.3477
				17	42.89	-40.1891		5.8502	1.5199
				19	13.87	-32.3558		4.6479	20.2996
				21	13.66	-32.9049		5.6337	21.1324
				25	34.02	-40.6647		5.9612	8.6612
				29	37.16	-43.4733		5.9604	3.9454

## Sheet: Lipid biomarkers
893MC	Depth(cm)	C15iso (mg/g)	C15anti (mg/g)	C16: 1w5c (mg/g)	CyC17 (mg/g)	d13C -C16: 1w5c		Archaeol-TMS (mg/g)	hydroxylarchaeol-TMS (mg/g)	d13C -archaeol TMS		C15anti to C15 iso	C16: 1w5c to C15 iso	Dd 13C archaeol to methane	hydroxyl to archaeol
	3.5	1.6098	4.6771	2.7131	0.4345	-33.52				-30.03		2.9054	1.6854	22.97
	4.5	1.5568	5.2671	3.1114	0.3118	-41.03		0.2126	0.1648	-28.806		3.3833	1.9986	24.194	0.7752
	5.5	0.9984	3.3236	3.0187	0.1791	-60.44		0.0974	0.0676	-61.86		3.3289	3.0235	-8.86	0.694
	6.5	0.136	0.3008	0.2403	0.0404	-62.37		0.181	0.1164	-64.089		2.2118	1.7669	-11.089	0.6431
	7.5	1.0965	3.1157	4.5896	0.2521	-63.071		0.1933	0.0943	-61.448		2.8415	4.1857	-8.448	0.4878
	8.5	1.4508	1.3771	3.2531	0.4981	-60.471		0.38	0.2293	-51.34		0.9492	2.2423	1.66	0.6034
	9.5	0.4092	1.0364	1.3079	0.1268	-61.421		0.7914	0.3497	-82.615		2.5327	3.1962	-29.615	0.4419
	10.5					-63.246		0.2076	0.0759	-61.542				-8.542	0.3656
	12.5	0.6174	1.9524	1.991	0.1179	-64.37		0.1113	0.1092	-58.55		3.1623	3.2248	-5.55	0.9811
	14.5	0.7554	1.7279	1.4991	0.1664	-58.845		0.0597	0.0742	-59.005		2.2874	1.9845	-6.005	1.2429
	16.5	0.5415	1.3395	1.0036	0.1056	-64.705		0.0427	0.0293	-68.984		2.4737	1.8534	-15.984	0.6862
	18.5	0.0934	0.2137	0.1953	0.0245	-61.128		0.1684	0.1228	-62.851		2.288	2.091	-9.851	0.7292
	20.5	0.1399	0.3676	0.375	0.0356	-66.112		0.0992	0.0137	-68.842		2.6276	2.6805	-15.842	0.1381
	22.5	0.184	0.4602	0.51	0.0417			0.1223	0.1113			2.5011	2.7717	53	0.9101
	24.5	0.1754	0.3634	0.2651	0.0206	-62.489		0.1939	0.1181			2.0718	1.5114	53	0.6091
	26.5	0.1583	0.2947	0.2175	0.045	-69.711		0.1736	0.0531	-69.938		1.8617	1.374	-16.938	0.3059
	28.5	0.2437	0.5419	0.4546	0.1037	-62.504		0.19	0.0657	-51.945		2.2236	1.8654	1.055	0.3458
	30.5	0.115	0.2177	0.3075	0.0363	-67.908		0.7043	0.2812	-55.639		1.893	2.6739	-2.639	0.3993
	32.5	0.1505	0.3513	0.4638	0.0692	-68.106		0.092	0.0257	-87.808		2.3342	3.0817	-34.808	0.2793
	34.5	0.093	0.1765	0.2732	0.0349	-80.619		0.1405	0.0391	-63.372		1.8978	2.9376	-10.372	0.2783
886MC	Depth(cm)	C15iso (mg/g)	C15anti (mg/g)	C16: 1w5c (mg/g)	CyC17 (mg/g)	d13C -C16: 1w5c		Archaeol-TMS (mg/g)	hydroxylarchaeol-TMS (mg/g)	d13C -archaeol TMS		C15anti to C15 iso	C16: 1w5c to C15 iso	Dd 13C archaeol to methane	hydroxyl to archaeol
	4	0.1834	0.3152	0.6437	0.1307	-40.659		0.0764	0.0493	-66.888		1.7186	3.5098	-13.888	0.6453
	6	0.3719	1.1716	1.2335	0.1118	-54.331		0.055	0.0319	-88.614		3.1503	3.3168	-35.614	0.58
	8	0.1302	0.3315	0.5394	0.0372	-68.637		0.1376	0.0205	-50.921		2.5461	4.1429	2.079	0.149
	10	0.3158	0.8732	1.5623	0.0897	-75.217		0.1614	0.0372	-95.378		2.765	4.9471	-42.378	0.2305
	12	0.0908	0.2161	0.7462	0.0663	-80.831		0.1466	0.0522	-96.295		2.38	8.2181	-43.295	0.3561
	14	0.0946	0.1793	0.7016	0.0803	-83.634		0.1968	0.0672	-94.617		1.8953	7.4165	-41.617	0.3415
	20	0.0421	0.1007	0.3415	0.0453	-69.5		0.2117	0.0223	-99.818		2.3919	8.1116	-46.818	0.1053
	24	0.036	0.0332	0.1954	0.0467			0.043		-100.82		0.9222	5.4278	-47.82
	28	0.0336	0.0507	0.1771	0.0251	-84.183		0.0343	0.0025927	-95.285		1.5089	5.2708	-42.285	0.0756
	32	0.0303	0.0391	0.18	0.0186	-83.606		0.0871		-88.598		1.2904	5.9406	-35.598
	34	0.0397	0.0837	0.2799	0.0276	-82.878		0.0653	0.0101	-98.616		2.1083	7.0504	-45.616	0.1547
	38	0.0494	0.1308	0.3755	0.0459	-84.804		0.2763		-98.051		2.6478	7.6012	-45.051
												2.1104	5.9128	-36.4918	0.2931
008PC	Depth(cm)	C15iso (mg/g)	C15anti (mg/g)	C16: 1w5c (mg/g)	CyC17 (mg/g)	d13C -C16: 1w5c		Archaeol-TMS (mg/g)	hydroxylarchaeol-TMS (mg/g)	d13C -archaeol TMS		C15anti to C15 iso	C16: 1w5c to C15 iso	Dd 13C archaeol to methane	hydroxyl to archaeol
	0.5	6.8302	7.2468	23.4766	0.9141	-43.892		3.0876	1.2251	-48.565		1.061	3.4372	4.435	0.3968
	1.5	3.222	4.4054	12.494	0.9882	-49.751		0.7674	0.2717			1.3673	3.8777	53	0.3541
	2.5	2.2844	3.8202	7.7993	0.4601	-51.26		0.312	0.1126	-83.755		1.6723	3.4142	-30.755	0.3609
	3.5	1.1046	2.1987	3.7906	0.2518	-58.887		0.3285	0.1037	-81.314		1.9905	3.4316	-28.314	0.3157
	4.5	1.2204	3.0588	3.9731	0.5679	-52.378		0.4388	0.0871	-79.431		2.5064	3.2556	-26.431	0.1985
	5.5	0.9228	2.1268	5.0284	0.3398	-54.704		0.3738	0.1412	-62.577		2.3047	5.4491	-9.577	0.3777
	6.5	1.0995	2.1567	3.2646	0.3016	-53.681		1.095	0.0995	-99.211		1.9615	2.9692	-46.211	0.0909
	7.5	0.5089	1.0745	1.288	0.1899			0.6975	0.1159	-93.788		2.1114	2.5309	-40.788	0.1662
	8.5	1.1949	2.8001	3.8732	0.2861			0.3374	0.1659	-98.445		2.3434	3.2414	-45.445	0.4917
	9.5	0.3109	0.6438	0.8138	0.0902	-61.249		0.4413	0.1063	-96.466		2.0708	2.6176	-43.466	0.2409
	11	0.4558	1.1875	1.8674	0.0852	-64.97		0.6202	0.0516	-94.416		2.6053	4.097	-41.416	0.0832
	13	0.5391	1.177	1.734	0.2447			0.3456	0.0996	-103.128		2.1833	3.2165	-50.128	0.2882
	15	0.4242	0.888	1.5732	0.374	-76.339		0.1224	0.0923	-101.653		2.0934	3.7086	-48.653	0.7541
	17	0.4446	1.0712	2.2014	0.1194	-76.453		1.062	0.1595	-100.957		2.4094	4.9514	-47.957	0.1502
	19	0.3373	0.8304	1.7942	0.3104	-78.526		0.1213	0.0466	-102.267		2.4619	5.3193	-49.267	0.3842
	21	0.7107	0.8533	1.3252	0.1885	-77.572						1.2006	1.8646
	23	0.537	1.0915	2.9173	0.4024	-80.175		0.6147	0.2894	-97.688		2.0326	5.4326	-44.688	0.4708
	25	0.3937	1.2898	3.3476	0.3729	-80.784		1.3094	0.2925	-100.727		3.2761	8.5029	-47.727	0.2234
	27	0.5565	1.2014	2.7072	0.2569	-81.337		0.5902	0.6053	-106.533		2.1588	4.8647	-53.533	1.0256
	29	0.4288	0.8356	2.3042	0.2653	-82.524		0.375	0.2323	-104.469		1.9487	5.3736	-51.469	0.6195
	31	0.305	0.7298	1.8856	0.263	-84.006				-103.985		2.3928	6.1823	-50.985
	33	0.9583	2.2152	5.3594	0.6433			0.6	0.4917	-105.116		2.3116	5.5926	-52.116	0.8195
												2.112	4.2423	-35.7853	0.3906

## Sheet: Data for Figure 5
C16: 1w5c (mg/g)						Archaeol (mg/g)
Reference	886MC	893MC	008PC	Elvert et al 2005		Reference	886MC	893MC	008PC	Elvert et al 2005
0.2147	0.6437	2.7131	23.4766	8.05			0.0764		3.0876	2.15
0.0346	1.2335	3.1114	12.494	17.31		0.0238	0.055	0.2126	0.7674	4.51
0.0287	0.5394	3.0187	7.7993	9.1		0.0123	0.1376	0.0974	0.312	2.15
0.0599	1.5623	0.2403	3.7906	5.43		0.0115	0.1614	0.181	0.3285	1.42
0.0288	0.7462	4.5896	3.9731	9.37		0.0104	0.1466	0.1933	0.4388	2.25
0.0379	0.7016	3.2531	5.0284	5.78		0.0127	0.1968	0.38	0.3738	1.91
0.034	0.3415	1.3079	3.2646	2.02		0.0078172	0.2117	0.7914	1.095	0.67
0.0159	0.1954		1.288	0.96		0.0315	0.043	0.2076	0.6975	0.48
0.048	0.1771	1.991	3.8732			0.029	0.0343	0.1113	0.3374
0.0552	0.18	1.4991	0.8138			0.0153	0.0871	0.0597	0.4413
0.0324	0.2799	1.0036	1.8674			0.0094317	0.0653	0.0427	0.6202
0.0244	0.3755	0.1953	1.734			0.0143	0.2763	0.1684	0.3456
0.1068		0.375	1.5732			0.0174		0.0992	0.1224
0.0428		0.51	2.2014			0.019		0.1223	1.062
0.0435		0.2651	1.7942			0.0192		0.1939	0.1213
0.0995		0.2175	1.3252			0.0186		0.1736
0.031		0.4546	2.9173			0.0122		0.19	0.6147
0.1248		0.3075	3.3476			0.00579		0.7043	1.3094
0.0474		0.4638	2.7072			0.0052908		0.092	0.5902
		0.2732	2.3042			0.0065933		0.1405	0.375
			1.8856			0.0039872
			5.3594			0.0032286			0.6
d13C C16: 1w5c						d13C Archaeol
Reference	886MC	893MC	008PC	Elvert et al 2005		Reference	886MC	893MC	008PC	Elvert et al 2005
-33.421	-40.659	-33.52	-43.892	-75		-31.087	-66.888	-30.03	-48.565	-111
-30.286	-54.331	-41.03	-49.751	-80		-26.263	-88.614	-28.806		-120
-31	-68.637	-60.44	-51.26	-92		-22.791	-50.921	-61.86	-83.755	-115
-29.338	-75.217	-62.37	-58.887	-91		-27.071	-95.378	-64.089	-81.314	-107
-22	-80.831	-63.071	-52.378	-96		-26	-96.295	-61.448	-79.431	-111
-30.6	-83.634	-60.471	-54.704	-96		-25.183	-94.617	-51.34	-62.577	-109
-27.308	-69.5	-61.421	-53.681	-95		-24.194	-99.818	-82.615	-99.211	-98
-26.81		-63.246		-96		-27.184	-100.82	-61.542	-93.788	-89
-27.65	-84.183	-64.37				-26.344	-95.285	-58.55	-98.445
-38.09	-83.606	-58.845	-61.249			-30.439	-88.598	-59.005	-96.466
-34.4	-82.878	-64.705	-64.97			-27	-98.616	-68.984	-94.416
-34.16	-84.804	-61.128				-27	-98.051	-62.851	-103.128
		-66.112	-76.339			-29.226		-68.842	-101.653
			-76.453			-38.66			-100.957
		-62.489	-78.526						-102.267
-39.8		-69.711	-77.572			-46		-69.938
-29.5		-62.504	-80.175			-46.324		-51.945	-97.688
-40		-67.908	-80.784			-37		-55.639	-100.727
-40.638		-68.106	-81.337			-41.7		-87.808	-106.533
		-80.619	-82.524					-63.372	-104.469
-46.535			-84.006						-103.985
-33.8									-105.116
Dd13C C16: 1w5c to methane						Dd13C Archaeol
Reference	886MC	893MC	008PC	Elvert et al 2005		Reference	886MC	893MC	008PC	Elvert et al 2005
-17.413	3.988	-27.77	-17.435	44		-15.079	-22.241	-24.28	-22.108	8
-22.237	25.714	-28.994		53		-18.214	-8.569	-16.77	-16.249	13
-25.709	-11.979	4.06	17.755	48		-17.5	5.737	2.64	-14.74	25
-21.429	32.478	6.289	15.314	40		-19.162	12.317	4.57	-7.113	24
-22.5	33.395	3.648	13.431	44		-26.5	17.931	5.271	-13.622	29
-23.317	31.717	-6.46	-3.423	42		-17.9	20.734	2.671	-11.296	29
-24.306	36.918	24.815	33.211	31		-21.192	6.6	3.621	-12.319	28
-21.316	37.92	3.742	27.788	22		-21.69		5.446		29
-22.156	32.385	0.75	32.445			-20.85	21.283	6.57
-18.061	25.698	1.205	30.466			-10.41	20.706	1.045	-4.751
-21.5	35.716	11.184	28.416			-14.1	19.978	6.905	-1.03
-21.5	35.151	5.051	37.128			-14.34		3.328
-19.274		11.042	35.653					8.312	10.339
-9.84			34.957						10.453
			36.267					4.689	12.526
-2.5		12.138				-8.7		11.911	11.572
-2.176		-5.855	31.688			-19		4.704	14.175
-11.5		-2.161	34.727			-8.5		10.108	14.784
-6.8		30.008	40.533			-7.862		10.306	15.337
		5.572	38.469					22.819	16.524
			37.985			-1.965			18.006
			39.116			-14.7
